# Supplementary material for: Many-body localization in a quantum simulator with programmable random disorder
Source: Springer Nature journal article supplement (doi:10.1038/nphys3783), 2016-06-06
Supplement: 41567_2016_BFnphys3783_MOESM23_ESM.pdf [file 41567_2016_BFnphys3783_MOESM23_ESM.pdf]

# Many-body localization in a quantum simulator with programmable random disorder

3 J. Smith<sup>\*</sup>, A. Lee<sup>\*</sup>, P. Richerme<sup>†</sup>, B. Neyenhuis<sup>\*</sup>, P. W. Hess<sup>\*</sup>, P. Hauke<sup>‡§</sup>, M. Heyl<sup>‡§¶</sup>, D. A. Huse<sup>||</sup>,  
4 C. Monroe<sup>\*</sup>

5 **Generating the effective Hamiltonian** We generate spin-spin interactions by applying spin-dependent  
6 optical dipole forces to ions confined in a 3-layer linear Paul trap with a 4.8 MHz radial frequency.  
7 Two off-resonant laser beams with a wavevector difference  $\Delta\vec{k}$  along a principal axis of transverse  
8 motion globally address the ions and drive stimulated Raman transitions. The two beams contain a  
9 pair of beatnote frequencies symmetrically detuned from the resonant transition at  $\nu_0 = 12.642819$   
10 GHz by a frequency  $\mu$ , comparable to the transverse motional mode frequencies. In the Lamb-  
11 Dicke regime, this results in the Ising-type Hamiltonian in Eq. (1)<sup>1-3</sup> with

$$J_{i,j} = \Omega^2 \omega_R \sum_{m=1}^N \frac{b_{i,m} b_{j,m}}{\mu^2 - \omega_m^2}, \quad (2)$$

12 where  $\Omega$  is the global Rabi frequency,  $\omega_R = \hbar \Delta k^2 / (2M)$  is the recoil frequency,  $b_{i,m}$  is the normal-  
13 mode matrix<sup>4</sup>, and  $\omega_m$  are the transverse mode frequencies. The coupling profile may be approx-  
14 imated as a power-law decay  $J_{i,j} \approx J_{max} / |i - j|^\alpha$ , where in principle  $\alpha$  can be tuned between 0  
15 and 3 by varying the laser detuning  $\mu$  or the trap frequencies  $\omega_m$ <sup>2,5</sup>. In this work,  $\alpha$  was tuned ap-

<sup>\*</sup>Joint Quantum Institute, University of Maryland Department of Physics and National Institute of Standards and Technology, College Park, MD 20742

<sup>†</sup>Department of Physics, Indiana University, Bloomington, IN, 47405

<sup>‡</sup>Institute for Quantum Optics and Quantum Information of the Austrian Academy of Sciences, 6020 Innsbruck, Austria

<sup>§</sup>Institute for Theoretical Physics, University of Innsbruck, 6020 Innsbruck, Austria

<sup>¶</sup>Physik Department, Technische Universität München, 85747 Garching, Germany

<sup>||</sup>Physics Department, Princeton University, Princeton, NJ 08544, USA

16 proximately between 0.95 and 1.81 by changing  $\mu$ . By asymmetrically adjusting the laser beatnote  
17 detuning  $\mu$  about the carrier by a value of  $B$  we apply a global Stark shift that can be thought of as  
18 a uniform effective transverse magnetic field of  $(B/2)\sigma_i^z$ .

19 We generate the effective disorder by applying a site-dependent Stark shift using a single  
20 355nm laser beam that is focused down tightly to a  $1/e^2$  waist of  $\sim 1.8\mu m$ . The ion separation is  
21  $\sim 2.5\mu m$ , thus the crosstalk between ions is negligible with a measured ratio of nearest-neighbor  
22 Rabi frequencies of  $\sim 20 : 1$ . We use an acousto optic modulator (AOM) with a full width at half  
23 maximum bandwidth of  $\approx 100$  MHz to apply the Stark shift to each ion. The AOM is not imaged  
24 onto the ions, so that driving the AOM with different frequencies allows the position of the beam to  
25 be scanned over the length of a 10 ion chain,  $\sim 20\mu m$ . The Stark shift is proportional to  $I^2$ . Thus,  
26 to achieve larger applied Stark shifts, we raster through the AOM drive frequencies corresponding  
27 to addressing each ion with a total cycle time of  $\sim 5\mu s$  instead of applying them simultaneously.  
28 Since we cannot control the sign of the site-specific Stark shift, to center the disorder strength  
29 around the global transverse field, we adjust the asymmetric detuning by  $W J_{max}/2$ .

30 **Sampling Error** We determine that averaging over 30 different random realizations of disorder is  
31 sufficient to have a sampling error smaller than the effect we observe by looking at the change in  
32 the time-averaged HD with respect to a change in the disorder strength. Figure 3b makes explicit  
33 that this error is much smaller than than the change in the time-averaged HD with respect to a  
34 change in the disorder strength.

35 **Measuring the spin-spin coupling matrix** In order to observe the dynamics between just two  
 36 of the ions in the chain, we shelve the other spins out of the interaction space. This is done  
 37 by performing a  $\pi$  rotation between  $|\downarrow\rangle_z$ ,  ${}^2S_{1/2} |F = 0, m_F = 0\rangle$ , and one of the Zeeman states,  
 38  ${}^2S_{1/2} |F = 1, m_F = -1\rangle$ , while shifting the two ions of interest out of resonance by applying a  
 39 large Stark shift with the individual addressing beam. We then apply our Hamiltonian which now  
 40 acts only on the two ions left in the interaction space and determine the elements of the spin-spin  
 41 coupling matrix by fitting the measured interaction Rabi flopping frequency between each pair of  
 42 spins.

43 **Arbitrary product state preparation** State initialization starts with optically pumping the spins  
 44 with high-fidelity to  $|\downarrow\downarrow\downarrow\cdots\rangle_z$ . Then we perform a global  $\pi/2$  rotation to bring the ions to  
 45  $|\downarrow\downarrow\downarrow\cdots\rangle_x$ . At this point we apply a Stark shift with the individual addressing beam to the spins  
 46 that are to be flipped and allow the chain to evolve until these ions are  $\pi$  out of phase with rest  
 47 of the ions. This, along with our ability to perform high fidelity global rotations, allows for the  
 48 preparation of any arbitrary product state along any direction of the Bloch sphere. Individual spin  
 49 flips can be achieved with a fidelity of  $\sim 0.97$ , while arbitrary state preparation can be done with a  
 50 fidelity of  $\sim (0.97)^N$ , where N is the number of spins flipped with the individual addressing beam.

51 **Determining a Set of Thermalizing Parameters** Extended Data Figure 1 shows the time evolu-  
 52 tion of  $\langle\sigma_i^x\rangle$  for different values of B for the spins initialized in the randomly chosen product state  
 53  $|\downarrow\downarrow\downarrow\uparrow\downarrow\downarrow\uparrow\downarrow\uparrow\rangle_x$ . Without a transverse field, the spins are in an eigenstate of the Ising interaction  
 54 and undergo no evolution. Once a transverse field is added the individual spins begin to lose mem-

55 ory of their initial conditions and as its strength is increased, the ions thermalize faster and more  
56 robustly.

57 To confirm the system is thermalizing, we measure the time evolution of the single site mag-  
58 netization,  $\langle \sigma_i^z \rangle$ , along an orthogonal direction for different strengths of the transverse magnetic  
59 field starting with the spins initialized in the Néel ordered state. As seen in Extended Data Fig. 1  
60 the spins have lost information about their initial conditions in the  $z$  direction for all values of  $B$ .

61 We calculate the spectral statistics of adjacent energy levels for the Hamiltonian and find they  
62 are not Poisson distributed for  $B = 4J_{max}$  and  $D_i = 0$  indicating that with no applied disorder, the  
63 system is not in a localized phase. Furthermore, one can determine if a system is in a thermal or  
64 localized regime by finding the correlation between adjacent energy splittings by calculating the  
65 ratio of two consecutive gaps<sup>6</sup>:

$$r_n = \frac{\min\{\delta_n, \delta_{n-1}\}}{\max\{\delta_n, \delta_{n-1}\}} \quad (3)$$

66 where  $\delta_n = E_{n+1} - E_n \geq 0$ . For a localized phase, where one expects a Poisson energy spectrum,  
67 the probability distribution of this order parameter is given by  $P_p(r) = 2/(1+r)^2$  and thus  $\langle r \rangle \approx$   
68 0.39. For energy level spacings following a random-matrix as predicted for a thermalizing regime,  
69 we calculate  $\langle r \rangle \approx 0.53$  for a chain of 10 spins. Extended Data Figure 2 shows that  $\langle r \rangle$  saturates  
70 to the expected value for a random matrix distribution, indicating that the Hamiltonian is thermal  
71 for sufficiently large  $B$ .

72 **Calculating the density matrix expected by the Eigenstate Thermalization Hypothesis** Given  
 73 a Hamiltonian and an initial state  $|\psi_0\rangle$ , the corresponding energy is  $\langle\psi_0|H|\psi_0\rangle$ . For a thermalizing  
 74 system satisfying ETH this energy should be equal to the classical energy:

$$E = \frac{\text{Tr}[He^{-\beta H}]}{\text{Tr}[e^{-\beta H}]} \quad (4)$$

75 for the appropriate  $\beta = 1/(k_B T)$ . When partitioning the entire system into subsystems A and B,  
 76 with the size of A much smaller than B (perhaps even a single spin), then, the density matrix on  
 77 site A at long times can be approximated by:

$$\rho_A = \frac{\text{Tr}_B[e^{-\beta H}]}{\text{Tr}[e^{-\beta H}]} \quad (5)$$

78 Since we start in the Néel ordered state, the initial energy given the Hamiltonian in Eq. (1)  
 79 is equal to zero,  $\langle\psi_0|H|\psi_0\rangle = 0$ . Equating this to the right hand side of Eq. (4) and solving for  
 80  $\beta$  gives  $\beta = 0$ , or  $T = \infty$ . Using this  $\beta$  in Eq. (5) gives a value for any reduced thermal density  
 81 matrix of:

$$\begin{pmatrix} 1/2 & 0 \\ 0 & 1/2 \end{pmatrix}$$

82 in agreement with the measured reduced density matrices in Fig. 2a.

83 **Comparison to Numerics** To demonstrate the MBL we observe is a general feature of our Hamil-  
 84 tonian we perform numerical simulations using exact diagonalization. Extended Data Figure 3  
 85 compares the experimentally measured time evolution of the normalized HD with numerics and  
 86 shows excellent agreement between them. We see similar agreement between experimental data  
 87 and numerics for the time evolution of the single-spin magnetizations (not shown). The aspects of

88 MBL we experimentally measure were independently verified numerically as generic characteris-  
89 tics of (1)<sup>7</sup>.

90 **Decoherence and Dephasing** To measure our system's coupling to the environment we fit an  
91 exponential decay to the dynamics in the upper left panel of Extended Data Fig. 1 as we expect  
92 no time evolution of  $\langle \sigma_i^x \rangle$  because the initial state is an eigenstate of the Hamiltonian and thus any  
93 dynamics give an estimate of the decoherence rate. We find this estimate to be  $J_{Max}t = 64.6$  which  
94 is approximately 60 times slower than the dynamics of the localization.

95 Extended Data Fig. 4 shows a numerical simulation of the extended dynamics for the model  
96 Hamiltonian with (green curves) and without (blue curves) crosstalk error between ions from the  
97 individual addressing and laser intensity noise on the Ising couplings. It is clear that the localization  
98 persists well beyond the experimental timescales even when accounting for experimental noise.  
99 We model the crosstalk noise on the disordered field by adding 5% of the Stark shift applied  
100 to adjacent ions to the size of the intended Stark shift which is consistent with the spillover we  
101 measure between ions. To incorporate noise on the spin-spin couplings, we scale the strength of  
102 the Ising couplings by a value we pull randomly from a Gaussian distribution centered around  
103  $\mu = 1$  with  $\sigma = 0.05$  for each instance of disorder because the laser intensity noise is slower  
104 than the duration of an experiment. The size of this simulated noise is consistent with the directly  
105 measured noise on  $J_{i,j}$ .

106 **Quantum Fisher Information** The quantum Fisher information (QFI) has recently been shown  
107 to witness genuinely multipartite entanglement<sup>8,9</sup>. From a quantum metrology perspective, the

108 QFI quantifies the sensitivity of a given input state to a unitary transformation  $e^{i\theta\hat{O}}$  generated by  
 109 the hermitian operator  $\hat{O}$ . In a pure state, it is given by <sup>10</sup>

$$F_Q = 4(\Delta\hat{O})^2 = 4(\langle\hat{O}^2\rangle - \langle\hat{O}\rangle^2). \quad (6)$$

110 For a local operator  $\hat{O} = \sum_{i=1}^N \hat{O}_i$  (where the difference between largest and smallest eigen-  
 111 value of  $\hat{O}_i$  is 1), the QFI witnesses entanglement as soon as

$$f_Q \equiv F_Q/N > 1. \quad (7)$$

112 To characterize the growth of entanglement out of the initial Néel state, the natural choice  
 113 of the generator  $\hat{O}$  is the staggered magnetization,  $\hat{O} = \sum_{i=1}^N (-1)^i \sigma_i^z / 2$ . Remarkably, this QFI is  
 114 proportional to the variance of the HD  $\mathcal{D}(t)$  given by Eq. (2) of the main text,

$$F_Q = 4N^2(\Delta\hat{\mathcal{D}})^2 = \sum_{i,j} [(-1)^{i+j} \langle\sigma_i^z \sigma_j^z\rangle] - \left[\sum_i (-1)^i \langle\sigma_i^z\rangle\right]^2, \quad (8)$$

115 when associating  $\mathcal{D}(t) = \langle\hat{\mathcal{D}}(t)\rangle$ , with  $\hat{\mathcal{D}} = 1/(2N)[1 - \sum_{i=1}^N (-1)^i \sigma_i^z]$ .

116 The QFI as defined in Eq. (6) assumes a pure state, i.e., that time evolution is purely unitary.  
 117 For mixed states, the QFI cannot be expressed as a simple expectation value of the operator  $\hat{O}$ <sup>10</sup>.  
 118 In general, decoherence reduces the purity of the system's state over experimental time scales. To  
 119 show that the measured increase of  $F_Q$  as defined in Eq. (8) is indeed due to coherent dynamics, we  
 120 compare to numerical calculations for a unitary time evolution using the experimental parameters.  
 121 Extended Data Fig. 5 shows the experimental data is always below the theoretical prediction for

122 a unitary time evolution. The loss of purity or other experimental imperfections such as detection  
123 error, therefore, do not generate a false positive indicator of entanglement in our system.

124 Extended Data Figure 6 further establishes this point, showing an increase in the QFI we  
125 measure and strong agreement between experimental data and theory when postselecting for mea-  
126 sured states with 5-spin excitations. We postselect because when  $B \gg J$  the Hamiltonian is  
127 effectively an XY model and conserves  $\sum_i \sigma_i^z$ , because Ising processes that flip spins along the  
128 large field are energetically forbidden. However, because of camera detection error we find there is  
129 significant leakage out of states with 5-spin excitations ( $\approx 70\%$  expected numerically,  $\approx 35\%$  de-  
130 tected) into states with 4 and 6-spin excitations ( $\approx 20\%$  detected) which should not be populated  
131 as the transverse magnetization is conserved modulo two spin flips in the transverse field Ising  
132 model. Thus, we post-select for states with 5-spin excitations. Extended Data Figures 5 and 6  
133 show a clear difference between the interacting case and a theory of free-fermions (see below) for  
134 the experimental data and numerical simulations, thus, establishing that the growth in QFI in the  
135 data and full-Hamiltonian numerics are due to a many-body effect.

136 To study how the localization changes with system size, we performed a numerical finite-size  
137 scaling. In order to obtain a well-behaved scaling, we use the Kac prescription<sup>11</sup>, i.e., we adjust  
138 the couplings as  $J_{ij} = J\mathcal{N}^{-1} |i - j|^{-\alpha}$ , where  $\mathcal{N} = (N - 1)^{-1} \sum_{i < j} |i - j|^{-\alpha}$ . Note that using  
139 this prescription the fundamental energy scale  $J$  differs by about a factor of 2 from  $J_{max}$ , the value  
140 used in the main text.

141 For  $\alpha > 2$ , the disordered long-range Ising Hamiltonian shows MBL behavior at large



142 disorder<sup>12</sup>. In Extended Data Fig. 7, we plot the dynamics of the QFI for  $\alpha = 3$ , where it grows  
143 consistent with the characteristic long-time growth of entanglement for an MBL state. In par-  
144 ticular, within a time window  $2^\alpha < tJ < 3^\alpha$  where only next-nearest-neighbor interactions are  
145 relevant, the system essentially behaves as a nearest-neighbor Ising model with a weak next-to-  
146 nearest-neighbor coupling. For such a system, a logarithmic growth of entanglement is expected,  
147 as we indeed find in that regime, see inset in Extended Data Fig. 7.

148 Moreover, in Extended Data Fig. 7, we compare our numerical results to the appropriate  
149 long-range free-fermionic theory (see below), which shows a quick system-size independent sat-  
150 uration of the QFI without further growth. Therefore, we conclude that the observed increase of  
151 the QFI is not possible in a quantum system without many-body interactions, thus giving a clear  
152 signature for true MBL behavior.

153 The situation is more complex at  $\alpha = 1.13$ . For  $B = 0$ , it has been predicted that within  
154 the range  $1 < \alpha < 2$  delocalized behavior could be expected in the thermodynamic limit<sup>12</sup>. As  
155 seen in Extended Data Fig. 8, for the considered system sizes up to  $N = 14$  the model displays all  
156 essential signatures of MBL, as found for  $\alpha = 3$ . However, the important question of whether this  
157 localization persists in the thermodynamic limit can only be addressed with system sizes larger  
158 than those accessible using exact diagonalization. Here, scaling our quantum simulator to larger  
159 system sizes could thus resolve a difficult open question, namely of the existence of ergodicity in  
160 the range  $1 < \alpha < 2$ . However, we would like to emphasize that the essential features of MBL  
161 are nevertheless captured by the 10-spin experimental system. In particular, we still find a time

162 window consistent with a logarithmic growth of entanglement, see inset in Extended Data Fig. 8.

163 In order to make a stronger connection between growth in the QFI and growth of entangle-  
 164 ment we calculate the entropy of entanglement between two halves of the chain:

$$S_A = -Tr[\rho_A \log \rho_A] \quad (9)$$

165 where  $\rho_A = Tr_B[\rho]$  and  $B$  is the other half of the spin chain. The entanglement entropy quantifies  
 166 the number of entangled bits between two subsystems.

167 In Extended Data Figs. 7 and 8 it is clear that there is long-time growth of the entanglement  
 168 entropy that is consistent with the expected growth for a MBL state<sup>13,14</sup> and is absent in the free-  
 169 fermion numerics. The difference between the numerics for the model Hamiltonian and the non-  
 170 interacting theory for the QFI and the entanglement entropy in Extended Data Figs. 9 and 10  
 171 distinguishes between the two cases for the experimental system size and timescale. These figures  
 172 also establish a qualitative connection between growth in the QFI and growth in entanglement.

173 To show that the QFI growth is truly due to interactions, we also compare numerics with the  
 174 experimentally applied Hamiltonian to a close approximation of  $H$ , Eq. (1) of the main text, with a  
 175 non-interacting theory. Using the Jordan-Wigner transformation,  $\sigma_j^- \rightarrow e^{-i\theta_j} c_j$ , with the phase of  
 176 the string operator  $\theta_j = \pi \sum_{j<i} c_j^\dagger c_j$ , the Hamiltonian Eq. (1) can be mapped to a fermionic theory  
 177 with annihilation and creation operators  $c_j$  and  $c_j^\dagger$ , respectively,

$$H = \sum_{i<j} J_{ij} (c_i^\dagger e^{i(\theta_j - \theta_i)} c_j + c_i^\dagger e^{i(\theta_j + \theta_i)} c_j^\dagger + h.c.) - \sum_i (B + D_i) c_i^\dagger c_i. \quad (10)$$

178 If  $J_{ij}$  contained only nearest-neighbor interactions, this Hamiltonian would become equivalent

179 to a free-fermionic theory. For general  $J_{ij}$ , however, the string operators generate interactions  
180 between the fermions. Over short times, and especially in a localized regime, the phases  $\theta_j$  are  
181 dominated by their initial values, i.e., it is a good approximation to replace (for the initial Neel  
182 state)  $\theta_j \rightarrow \pi \sum_{j<i} ((-1)^j + 1)/2$  in the Hamiltonian. This replacement amounts to approximating  
183  $H$  by a non-interacting fermionic theory with long-range hopping and pairing. The QFI for that  
184 case is included in Extended Data Figs. 7 and 8. As one can see, the QFI quickly saturates to  
185 values below  $f_Q = 1$ . The experimentally and numerically observed further growth of the QFI  
186 is thus truly due to interactions, and cannot be captured within a free-fermionic theory, even with  
187 long-range hopping.

- 188 1. Mølmer, K. & Sørensen, A. Multiparticle Entanglement of Hot Trapped Ions. *Phys. Rev. Lett.*  
190 **82**, 1835-1838 (1999).
- 191 2. Porras, D. & Cirac, J. I. Effective Quantum Spin Systems with Trapped Ions. *Phys. Rev. Lett.*  
192 **92**, 207901 (2004).
- 193 3. Kim, K. *et al.* Entanglement and Tunable Spin-Spin Couplings between Trapped Ions Using  
194 Multiple Transverse Modes. *Phys. Rev. Lett.* **103**, 120502 (2009).
- 195 4. James, D. F. V. Quantum dynamics of cold trapped ions with application to quantum compu-  
196 tation. *Applied Physics B* **66**, 181-190 (1998).
- 197 5. Islam, R. *et al.* Emergence and Frustration of Magnetism and Variable-Range Interactions in  
198 a Quantum Simulator. *Science* **340**, 583-587 (2013).

- 199 6. Oganesyan, V. & Huse, D. A. Localization of interacting fermions at high temperature. *Phys.*  
200 *Rev. B* **75**, 155111 (2007).
- 201 7. Wu, Y-L. & Das Sarma, S. Understanding analog quantum simulation dynamics in coupled  
202 ion-trap qubits. *Phys. Rev. A* **93**, 022332 (2016).
- 203 8. Hyllus, P. *et al.* Fisher information and multiparticle entanglement. *Phys. Rev. A* **85**, 022321  
204 (2012).
- 205 9. Tóth, G. Multipartite entanglement and high precision metrology. *Phys. Rev. A* **85**, 022322  
206 (2012).
- 207 10. Braunstein, S. L. & Caves, C. M. Statistical distance and the geometry of quantum states.  
208 *Phys. Rev. Lett.* **72**, 3439-3443 (1994).
- 209 11. Kac, M. Can One Hear the Shape of a Drum? *Am. Math. Monthly* **73**, 1-23 (1966).
- 210 12. Burin, A. L. Energy delocalization in strongly disordered systems induced by the long-range  
211 many-body interaction. *arXiv:cond-mat/0611387* (2006).
- 212 13. Bardarson, J. H., Pollmann, F. & Moore, J. E. Unbounded Growth of Entanglement in Models  
213 of Many-Body Localization. *Phys. Rev. Lett.* **109**, 017202 (2012).
- 214 14. Pino, M. Entanglement growth in many-body localized systems with long-range interactions.  
215 *Phys. Rev. B* **90**, 174204 (2014).

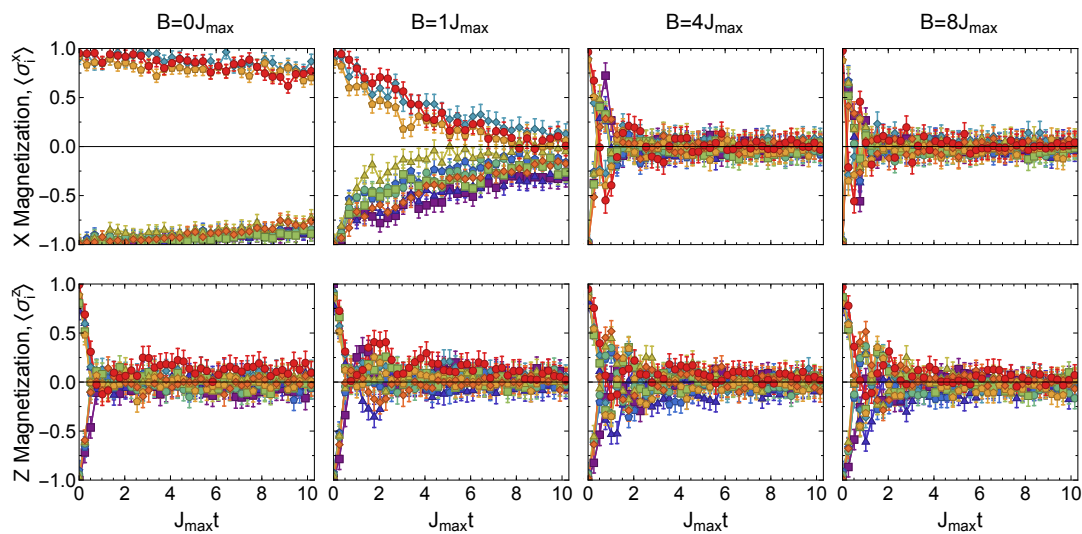

216

217 **Extended Data Figure 1: Measured thermalization in the transverse field Ising model.** The  
 218 upper panels show the time dynamics of  $\langle \sigma_i^x \rangle$  (different colors represent different ions) for 10  
 219 spins prepared in the random product state  $|\downarrow\downarrow\downarrow\uparrow\downarrow\downarrow\uparrow\downarrow\uparrow\rangle_x$ , for different transverse magnetic field  
 220 strengths. For  $B = 0$  the spins are in an eigenstate and do not thermalize. However, as the strength  
 221 of  $B$  is increased the system begins to thermalize more robustly and quickly. The lower panel plots  
 222 the time evolution of  $\langle \sigma_i^z \rangle$  with 10 spins prepared in the Néel ordered state in the  $z$  direction for different  
 223 transverse magnetic field strengths. We conclude that the system is in the thermalizing regime for  
 224  $B = 4J_{\max}$  since we observe thermalizing behavior along two orthogonal directions. Error bars  
 225 are 1 standard deviation of statistical error.

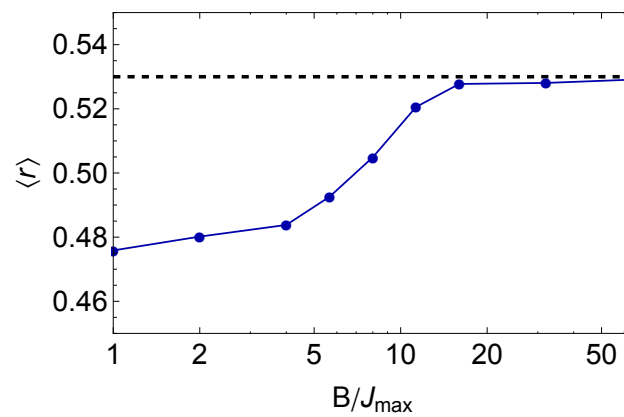

226

227 Extended Data Figure 2: **Thermalizing level statistics.** The calculated value of  $\langle r \rangle$  with respect  
228 to  $B$  saturates close to the predicted value for a random-matrix distribution (dashed black line)  
229 implying that the Hamiltonian is in the thermal phase for sufficiently large  $B$ .

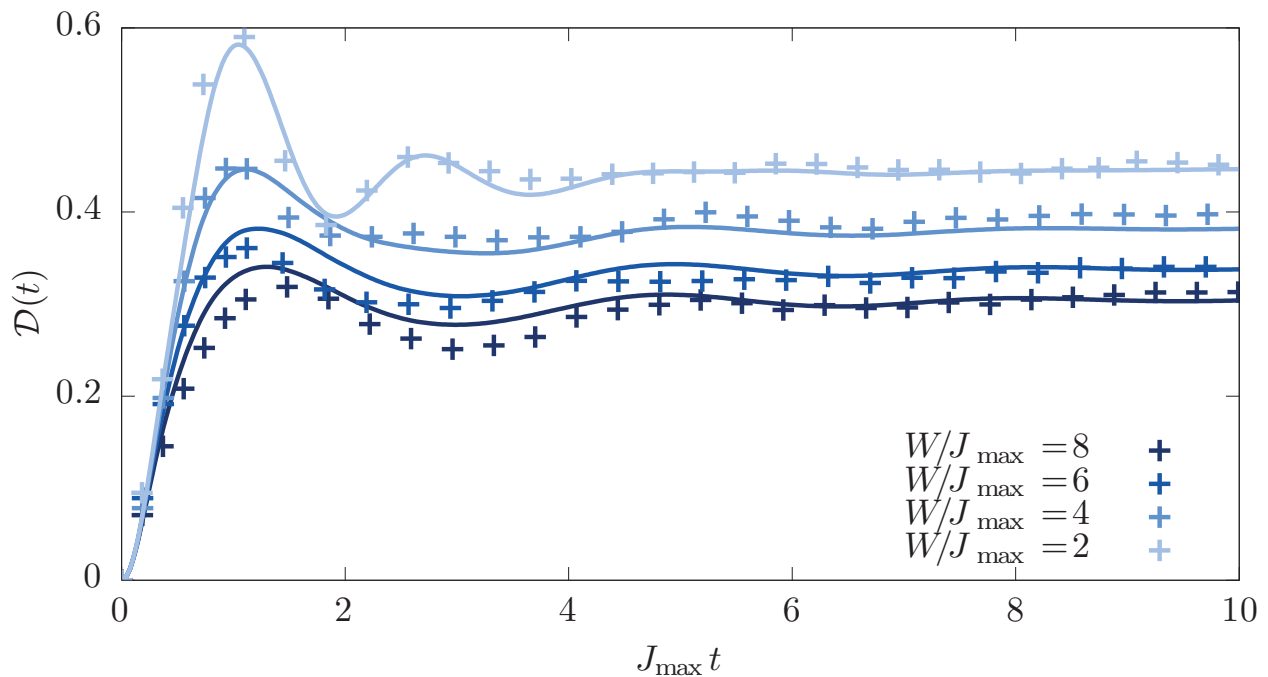

231 **Extended Data Figure 3: Comparison of the experimental data (crosses) with exact numerical**  
 232 **simulations (blue lines) for normalized Hamming distance.** There is excellent agreement be-  
 233 tween the numerical simulations using the experimental parameters and the measured data. This  
 234 demonstrates that the observed effects are general features of the Hamiltonian.

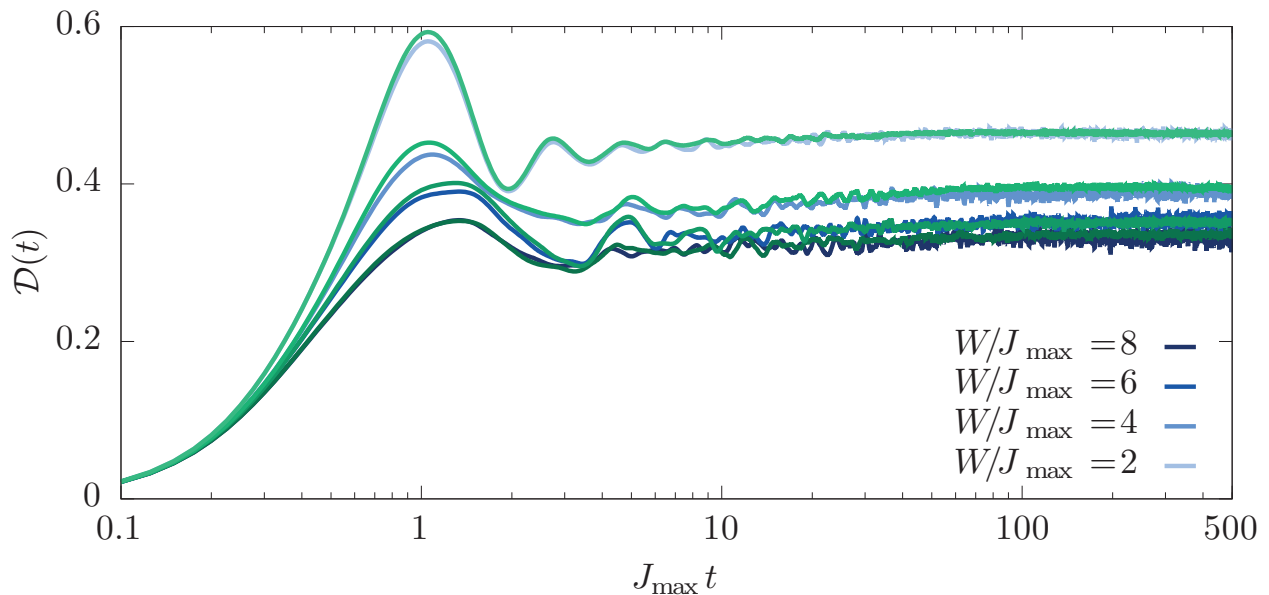

235

236 Extended Data Figure 4: **Numerical simulations of the extended time evolution of the Ham-**  
237 **ming distance for the model Hamiltonian (blue curves) and with experimental noise (green**  
238 **curves).** The localization we observe persists much longer than the experimental timescale in  
239 the model Hamiltonian (blue curves) even when accounting for laser intensity noise and crosstalk  
240 between the ions from the individual addressing beam (green curves).



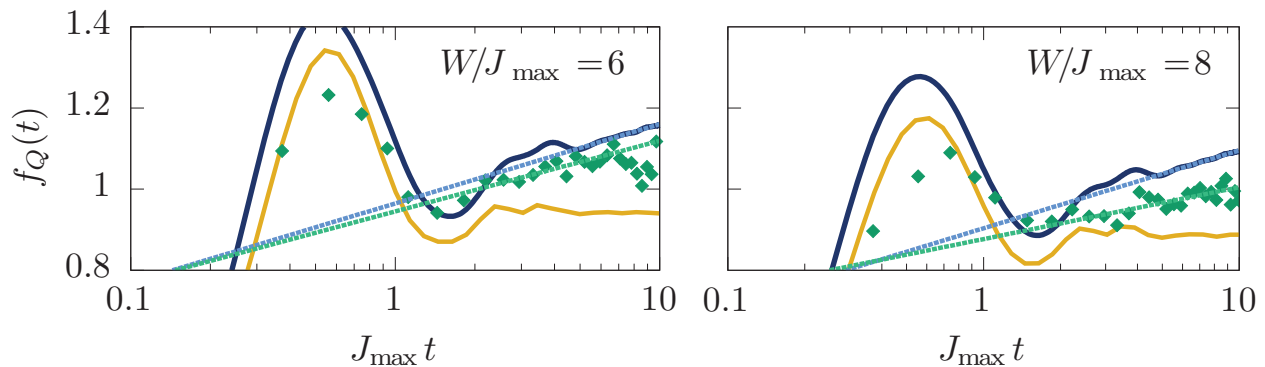

241

242 Extended Data Figure 5: **Comparison of experimental data (green dots) with exact numerical**  
 243 **simulations for the experimentally applied Hamiltonian (thick blue lines) and free-fermion**  
 244 **Theory (orange) for QFI.** The solid straight lines represent logarithmic fits to the numerical (light  
 245 blue) and experimental data (light green). Deviations from the ideal coherent dynamics due to  
 246 decoherence and other imperfections in the experimental setup, such as detection error, lead to a  
 247 reduction of the QFI. Importantly, this suggests that experimental imperfections do not generate a  
 248 false positive for entanglement. Moreover, there is long-time growth in the QFI from the measured  
 249 data and applied Hamiltonian numerics that is absent in the free-fermion theory.

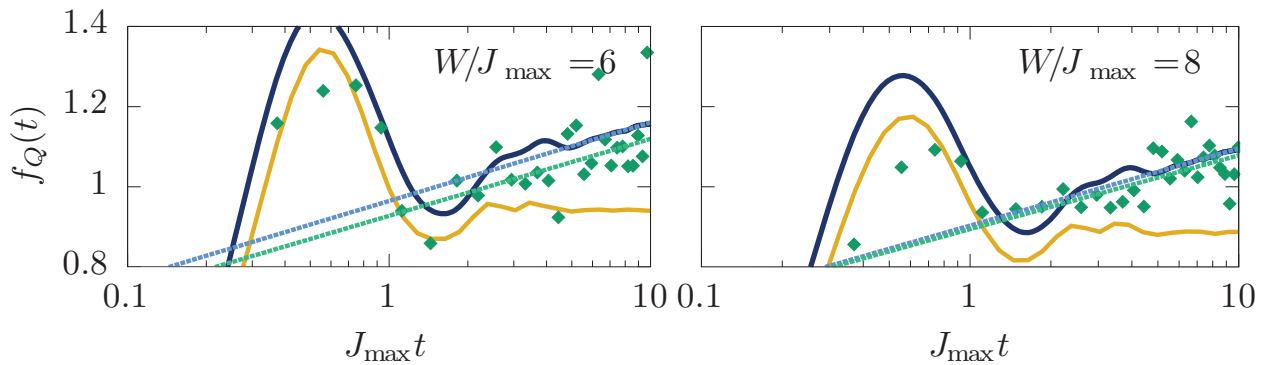

250

251 Extended Data Figure 6: **Comparison of postselected experimental data (green dots) with ex-**  
 252 **act numerical simulations for the experimentally applied Hamiltonian (thick blue lines) and**  
 253 **free-fermion Theory (orange) for QFI.** The solid straight lines represent logarithmic fits to the  
 254 numerical results for the experimentally applied Hamiltonian (light blue) and postselected data  
 255 for results with 5 spin flips (light green). The increase in the postselected QFI and the agreement  
 256 between the postselected data and numerical simulations supports the claim that experimental im-  
 257 perfections decrease the value of the QFI for the full experimental data.

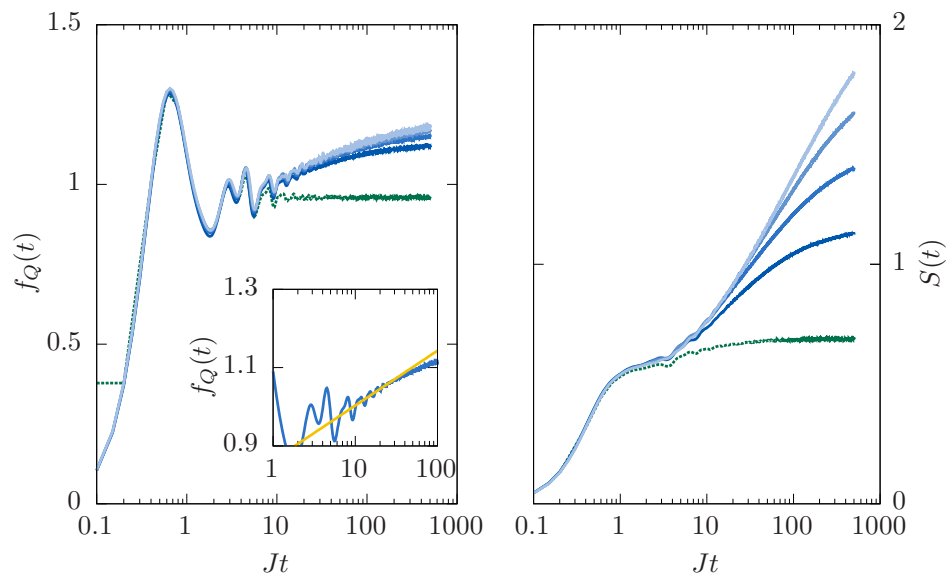

258

259 Extended Data Figure 7: **QFI and entanglement entropy from exact diagonalization ( $\alpha = 3$**   
 260 **and  $W/J = 8$ )**. Left panel: When subject to disorder, the QFI of the staggered magnetization  
 261 shows a characteristic growth of entanglement (blue lines; from dark to light:  $N = 8, 10, 12, 14$   
 262 averaged over  $10^6, 3 \times 10^5, \dots, 2500$  disorder realizations). This growth is absent in a theory of  
 263 free-fermions with long-range hopping and pairing (green dashed lines with  $N = 14$  (dark green)  
 264 averaged over 10000 realizations). Left panel inset: In a time window dominated by next-nearest  
 265 neighbor interactions,  $2^\alpha < tJ < 3^\alpha$ , one observes a characteristic logarithmic entanglement  
 266 growth, expected for a MBL system with short-range interactions. Right panel: The entanglement  
 267 entropy between two halves of the chain shows long-time logarithmic growth for the interacting  
 268 case and saturates for the free-fermion theory consistent with the expectation for a MBL state and  
 269 single-particle localized state, respectively, and a qualitative agreement between growth in QFI and  
 270 entanglement entropy.

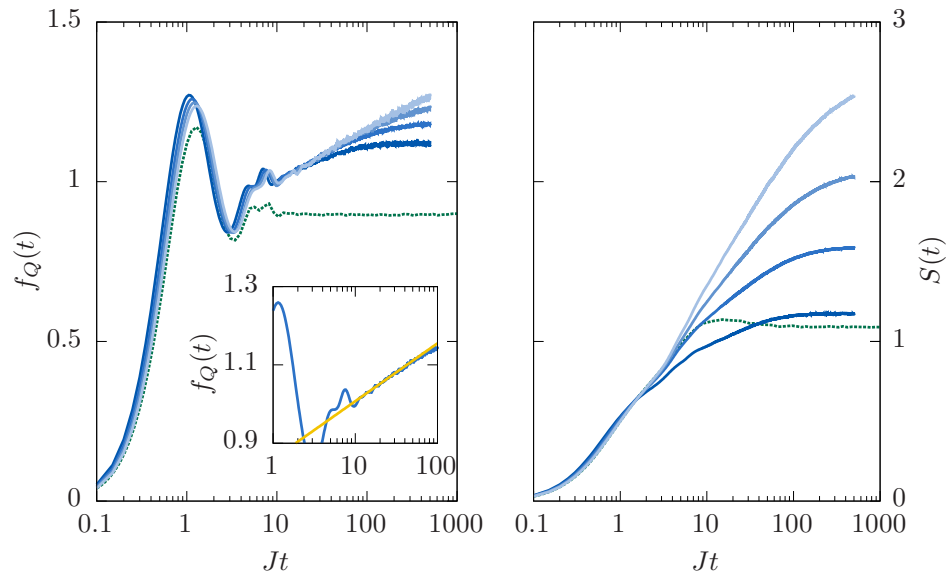

271

272 Extended Data Figure 8: **QFI and entanglement entropy from exact diagonalization** ( $\alpha =$   
 273 **1.13 and  $W/J = 8$** ). Same color coding as in Extended Data Fig. 7. Importantly, for the experi-  
 274 mentally relevant system size of  $N = 10$ , we again find a time window consistent with a logarithmic  
 275 growth of entanglement in the growth of QFI (see left inset) and half-chain entanglement entropy.

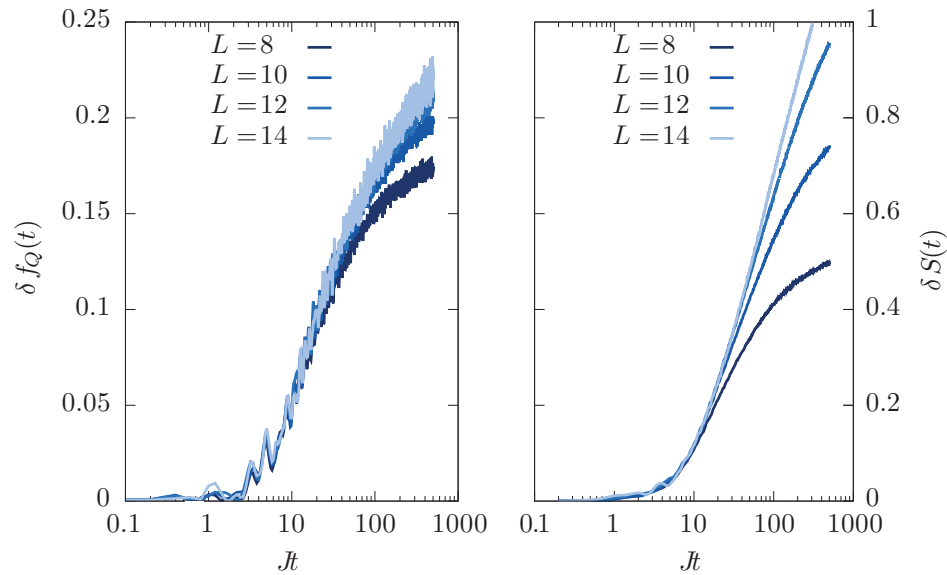

276

277 **Extended Data Figure 9: Difference between numerics for the interacting model Hamiltonian**  
 278 **and free-fermion theory for QFI and entanglement entropy ( $\alpha = 3$  and  $W/J = 8$ ).** There is  
 279 a clear departure between the numerically calculated QFI and entanglement entropy for the model  
 280 Hamiltonian and the free-fermion theory.

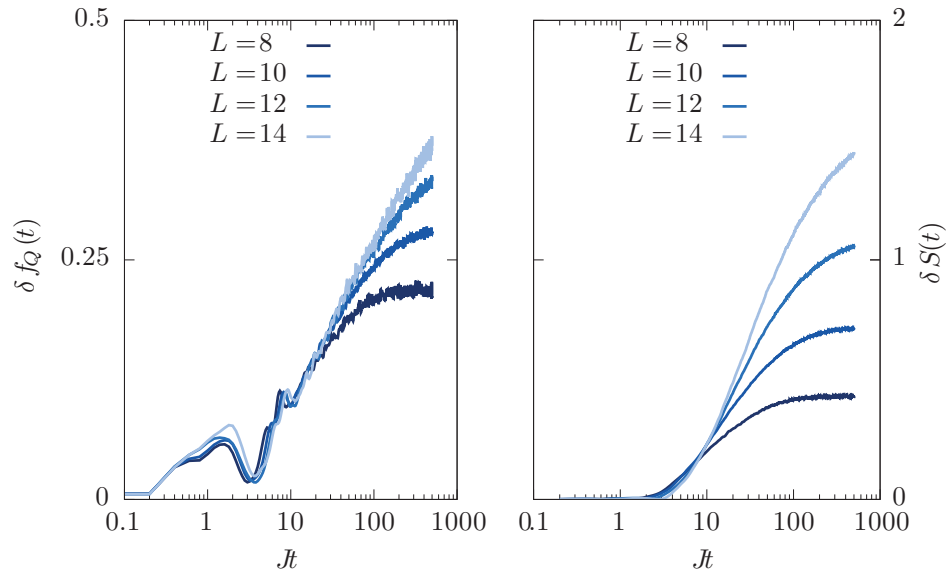

281

282 Extended Data Figure 10: **Difference between numerics for the interacting model Hamiltonian**  
 283 **and free-fermion theory for QFI and entanglement entropy ( $\alpha = 1.13$  and  $W/J = 8$ ).**

284 There is a clear departure between the numerically calculated QFI and entanglement entropy for  
 285 the model Hamiltonian and the free-fermion theory for  $N=10$  on the experimental timescale.
